# Supplementary material for: Polyvascular Disease and the Incidence of Cancer in Patients with Coronary Artery Disease
Source: PubMed Central journal article supplement (PMC9646297; doi:10.31662/jmaj.2022-0098), 2022-09-26
Supplement: 2433-3298-5-4-0498-s001.pdf [file 2433-3298-5-4-0498-s001.pdf]

Table S1. Clinical characteristics of patients with each vascular disease in the cohort with polyvascular disease

| Characteristic                     | Aortic disease        | Peripheral<br>arterial disease | Both aortic and<br>peripheral<br>arterial diseases | Other arterial<br>diseases | P value |
|------------------------------------|-----------------------|--------------------------------|----------------------------------------------------|----------------------------|---------|
|                                    | N=373                 | N=251                          | N=22                                               | N=70                       |         |
| Age, y                             | 74 ± 9<br>(75, 70-80) | 74 ± 8<br>(75, 69-79)          | 76 ± 8<br>(74, 72-83)                              | 72 ± 11<br>(74, 67-79)     | 0.0593  |
| Male, no. (%)                      | 309<br>(82.8)         | 207<br>(82.5)                  | 17<br>(77.3)                                       | 46<br>(65.7)               | 0.0076  |
| Body mass index, kg/m <sup>2</sup> | 24 ± 8<br>(24, 22-26) | 25 ± 9<br>(24, 22-26)          | 25 ± 4<br>(24, 22-26)                              | 25 ± 7<br>(24, 22-26)      | 0.9670  |

|                                                |            |            |           |           |         |
|------------------------------------------------|------------|------------|-----------|-----------|---------|
| Hypertension, no. (%)                          | 255 (68.4) | 163 (64.9) | 11 (50.0) | 42 (60.0) | 0.1986  |
| Dyslipidemia, no. (%)                          | 199 (53.4) | 135 (53.8) | 11 (50.0) | 39 (55.7) | 0.9686  |
| Diabetes mellitus, no. (%)                     | 65 (17.4)  | 115 (45.8) | 4 (18.2)  | 26 (37.1) | <0.0001 |
| Chronic kidney disease, no. (%)                | 80 (21.5)  | 66 (26.3)  | 5 (22.7)  | 13 (18.6) | 0.4191  |
| Chronic obstructive pulmonary disease, no. (%) | 17 (4.6)   | 9 (3.6)    | 2 (9.1)   | 4 (5.7)   | 0.6105  |
| Previous stroke, no. (%)                       | 14 (3.8)   | 17 (6.8)   | 1 (4.6)   | 5 (7.1)   | 0.3317  |
| Cigarette smoking, no. (%)                     | 241 (64.6) | 180 (71.7) | 14 (63.6) | 25 (35.7) | <0.0001 |
| Stable ischemic heart disease, no. (%)         | 358 (96.0) | 244 (97.2) | 22 (100)  | 66 (94.3) | 0.4996  |
| Acute coronary syndrome, no. (%)               | 15 (4.0)   | 7 (2.8)    | 0 (0)     | 4 (5.7)   | 0.4996  |
| Previous myocardial infarction, no. (%)        | 139 (37.3) | 94 (37.5)  | 13 (59.1) | 18 (25.7) | 0.0372  |
| History of heart failure, no. (%)              | 17 (4.6)   | 21 (8.4)   | 2 (9.1)   | 3 (4.3)   | 0.1860  |

|                                             |             |             |             |             |        |
|---------------------------------------------|-------------|-------------|-------------|-------------|--------|
| Left ventricular ejection fraction, %       | 58 ± 10     | 58 ± 9      | 50 ± 14     | 55 ± 12     | 0.0217 |
|                                             | (62, 55-64) | (61, 55-64) | (52, 44-62) | (59, 50-64) |        |
| Percutaneous coronary intervention, no. (%) | 135 (36.2)  | 100 (39.8)  | 13 (59.1)   | 22 (31.4)   | 0.0976 |
| Coronary artery bypass grafting, no. (%)    | 74 (19.8)   | 62 (24.7)   | 3 (13.6)    | 11 (15.7)   | 0.2328 |
| Medications at final follow-up              |             |             |             |             |        |
| Antiplatelets, no. (%)                      | 184 (49.3)  | 144 (57.4)  | 13 (59.1)   | 44 (62.9)   | 0.0771 |
| Anticoagulants, no. (%)                     | 75 (20.1)   | 52 (20.7)   | 5 (22.7)    | 15 (21.4)   | 0.9858 |
| Renin-angiotensin inhibitors, no. (%)       | 148 (39.7)  | 106 (42.2)  | 9 (40.9)    | 30 (42.9)   | 0.9134 |
| Beta-blockers, no. (%)                      | 173 (46.4)  | 115 (45.8)  | 7 (31.8)    | 34 (48.6)   | 0.5740 |
| Calcium-channel blockers, no. (%)           | 156 (41.8)  | 93 (37.1)   | 8 (36.4)    | 36 (51.4)   | 0.1670 |
| Diuretics, no. (%)                          | 55 (14.8)   | 49 (19.5)   | 6 (27.3)    | 12 (17.1)   | 0.2495 |

|                               |                      |                      |                      |                      |        |
|-------------------------------|----------------------|----------------------|----------------------|----------------------|--------|
| Statins, no. (%)              | 166 (44.5)           | 103 (41.0)           | 8 (36.4)             | 39 (55.7)            | 0.1483 |
| All-cause death, no. (%)      | 52 (13.9)            | 44 (17.5)            | 6 (27.3)             | 7 (10.0)             | 0.1408 |
| Cardiovascular death, no. (%) | 22 (5.9)             | 13 (5.2)             | 1 (4.6)              | 1 (1.4)              | 0.4898 |
| Cancer death, no. (%)         | 5 (1.3)              | 10 (4.0)             | 2 (9.1)              | 1 (1.4)              | 0.0363 |
| Length of follow-up, days     | 1064 ± 480           | 1008 ± 473           | 1174 ± 549           | 1091 ± 520           | 0.2438 |
|                               | (1110, 728-<br>1470) | (1047, 673-<br>1450) | (1199, 666-<br>1600) | (1114, 688-<br>1483) |        |

---

Plus-minus values are means ± standard deviation with the median and interquartile range. Body mass index is the weight divided by the square of the height.
