# Supplementary material for: Polyvascular Disease and the Incidence of Cancer in Patients with Coronary Artery Disease
Source: PubMed Central journal article supplement (PMC9646297; doi:10.31662/jmaj.2022-0098), 2022-09-26
Supplement: 2433-3298-5-4-0498-s002.pdf [file 2433-3298-5-4-0498-s002.pdf]

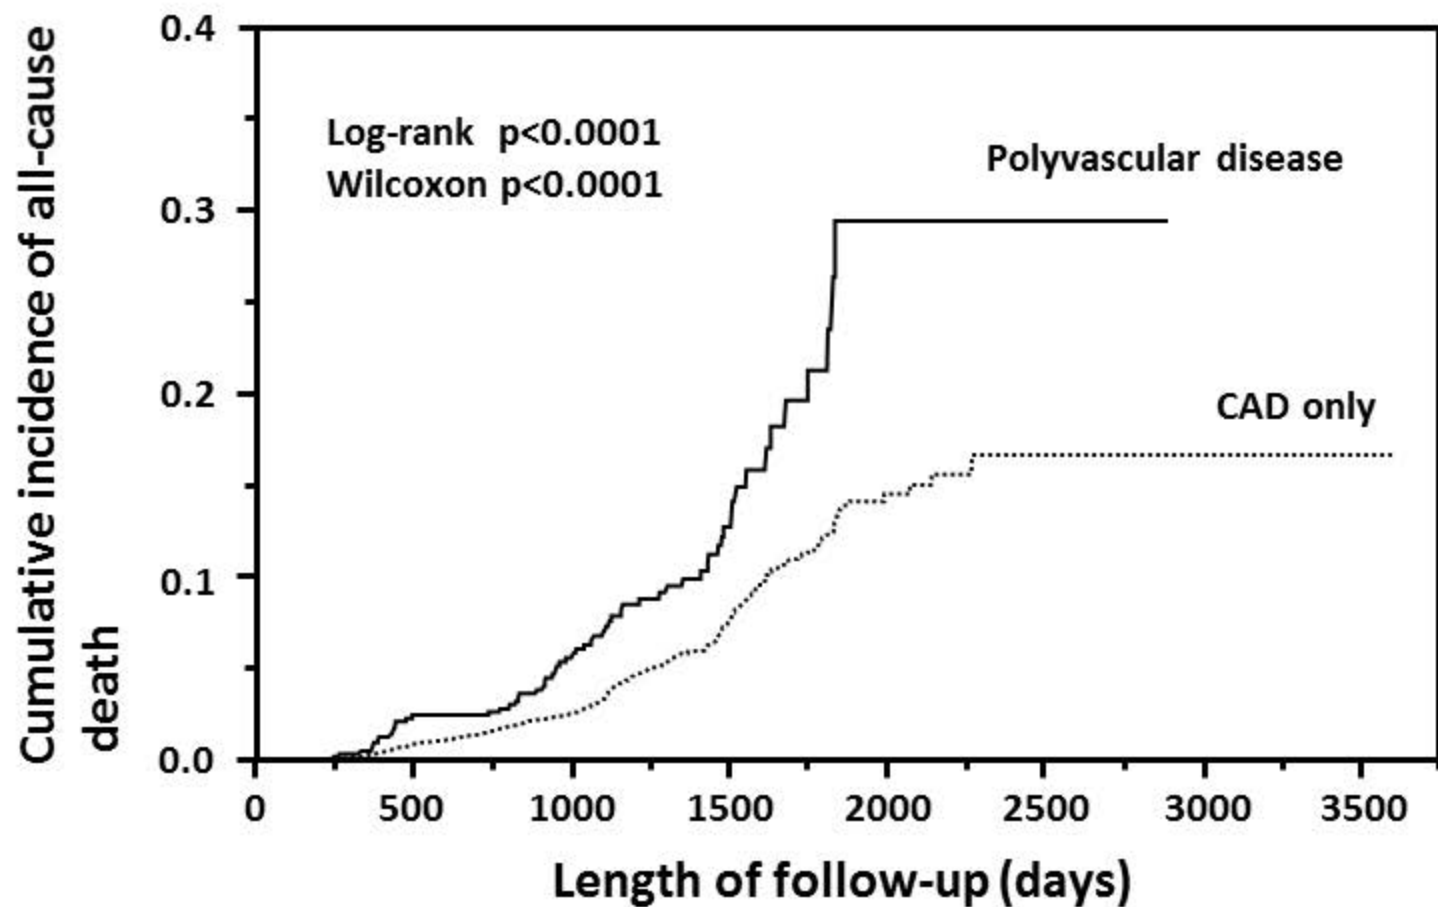

No. at risk

CAD only

Polyvascular disease

|      |      |      |      |     |    |    |   |
|------|------|------|------|-----|----|----|---|
| 8140 | 6651 | 4784 | 1623 | 217 | 32 | 15 | 3 |
| 716  | 578  | 414  | 135  | 10  | 3  | -  | - |
